# Supplementary material for: Breaking hydrogen-bonds in aqueous electrolytes towards highly reversible zinc-ion batteries
Source: Royal Society of Chemistry journal article supplement (doi:10.1039/d4ta02316a), 2024-01-01
Supplement: d4ta02316a1.pdf [file d4ta02316a1.pdf]

Supplementary Information

**Breaking Hydrogen-bond in Aqueous Electrolyte Towards Highly Reversible**

**Zinc-ion Batteries**

*Yilong Zhu, Qianru Chen, Junnan Hao\*, and Yan Jiao\**

Y. Zhu, Q. Chen, Dr. J. Hao, Prof. Y. Jiao

School of Chemical Engineering, The University of Adelaide, Adelaide, 5005,

Australia

Email: [yan.jiao@adelaide.edu.au](mailto:yan.jiao@adelaide.edu.au); [junnan.hao@adelaide.edu.au](mailto:junnan.hao@adelaide.edu.au)

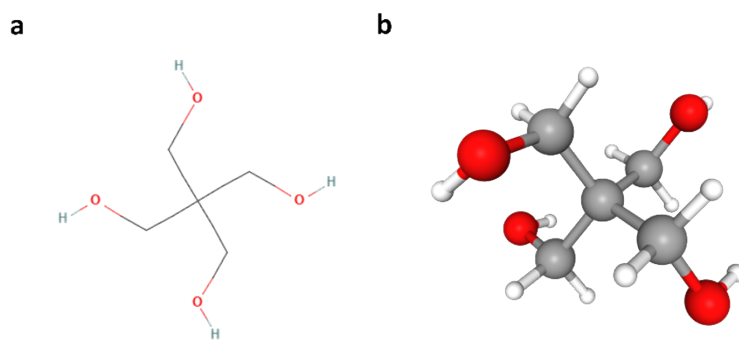

**Figure S1.** (a) The diagram of the 2D structure of PTT. (b) The corresponding 3D structure. Colour code: red, O; white, H; grey, C.

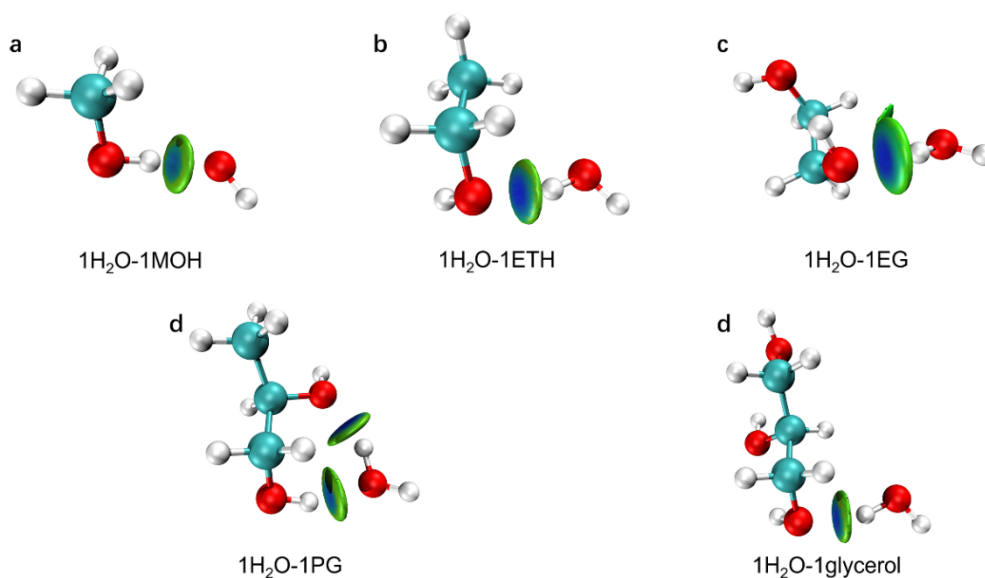

**Figure S2.** Schematic diagram of intermolecular interactions between water molecule and a) Methanol, b) Ethanol, c) Ethylene glycol, d) Propylene glycol, e) Glycerol. Colour code: red, O; white, H; cyan, C.

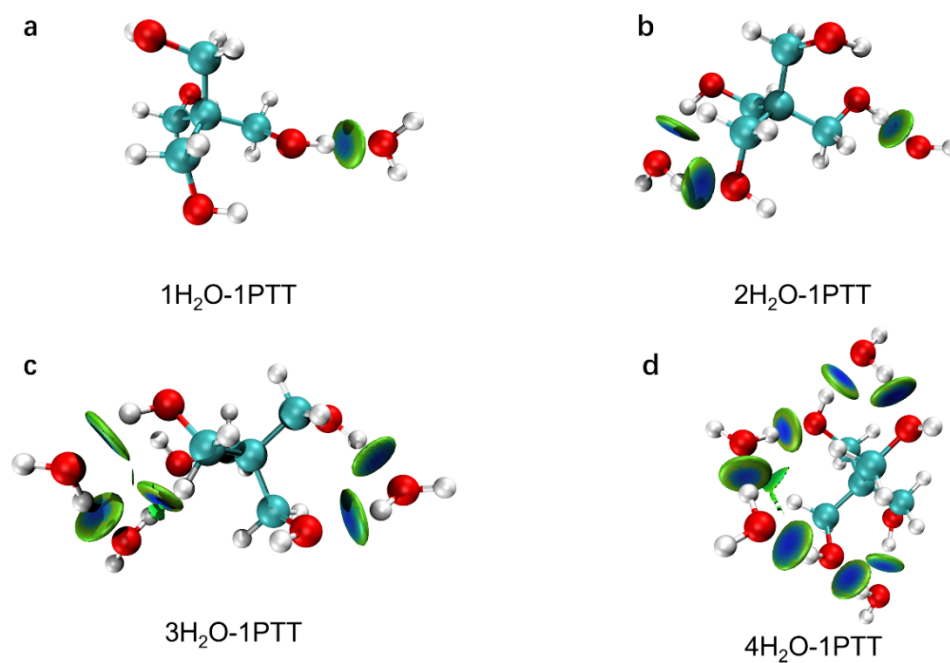

**Figure S3.** Schematic diagram of intermolecular interactions between PTT and a)  $1\text{H}_2\text{O}$ , b)  $2\text{H}_2\text{O}$ , c)  $3\text{H}_2\text{O}$ , d)  $4\text{H}_2\text{O}$ . Colour code: red, O; white, H; cyan, C.

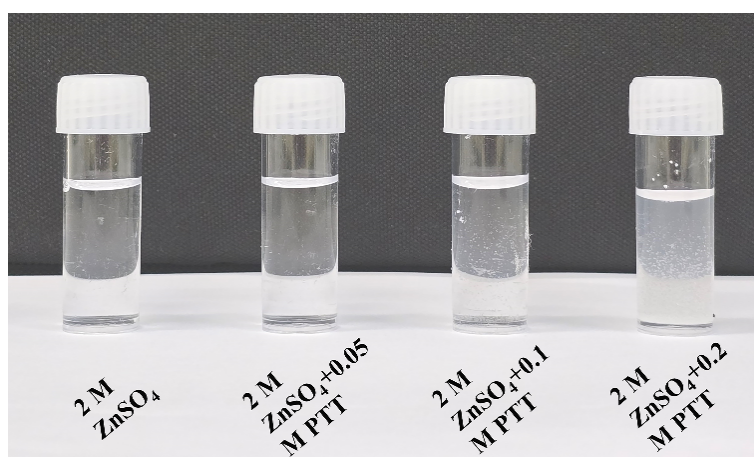

**Figure S4.** Snapshot of 2 M  $\text{ZnSO}_4$  electrolyte with different concentrations of PTT addition after 7 days.

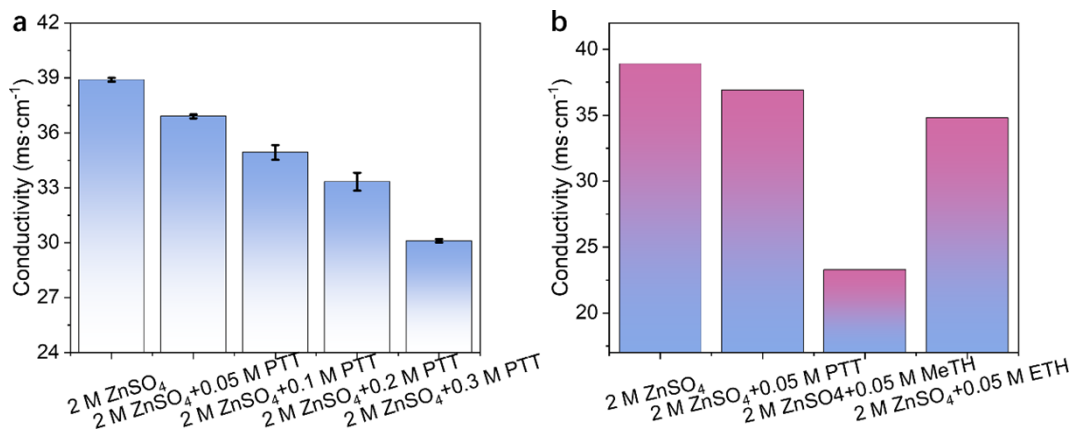

**Figure S5.** Conductivity of ZnSO<sub>4</sub> solutions containing different concentrations of PTT (a) and containing different additives, including PTT, MeTH (Methanol) and ETH (ethanol) at the same concentration (b).

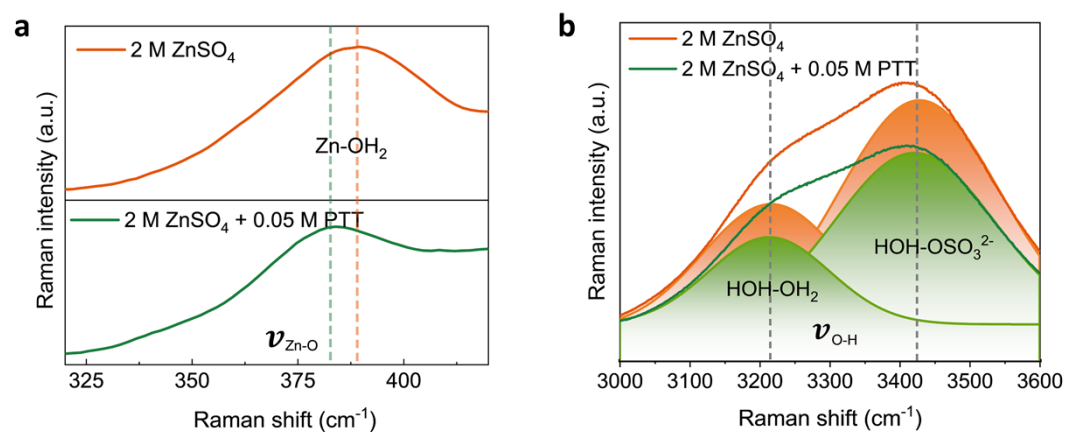

**Figure S6.** Raman spectroscopy of pure 2 M ZnSO<sub>4</sub> electrolyte and 2 M ZnSO<sub>4</sub> with 0.05 M PTT electrolyte. (a) Zn-O stretch vibration; (b) O-H stretch vibration deconvoluted with Gaussian function.

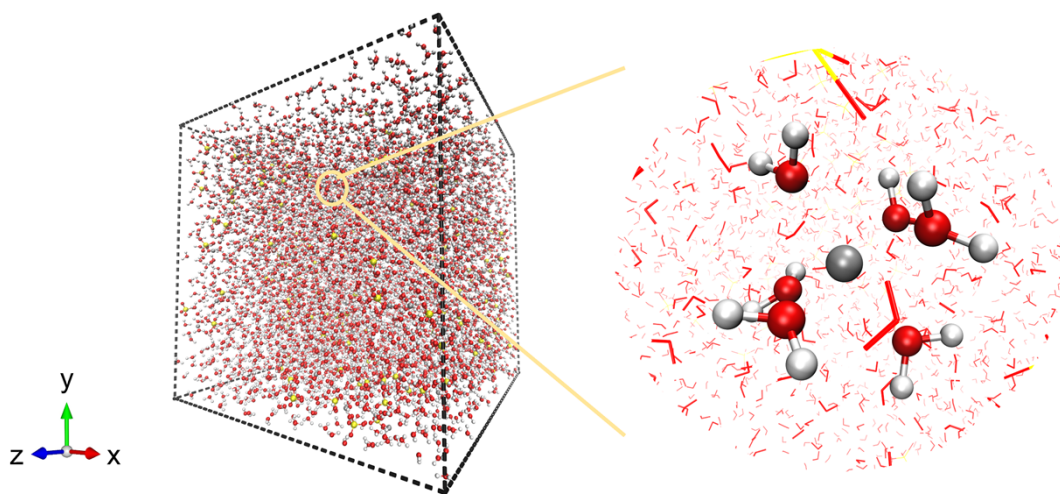

**Figure S7.** Snapshot of the model for 2 M  $\text{ZnSO}_4$  after theoretical MD simulation. Colour code: red, O; white, H; yellow, S; grey, Zn.

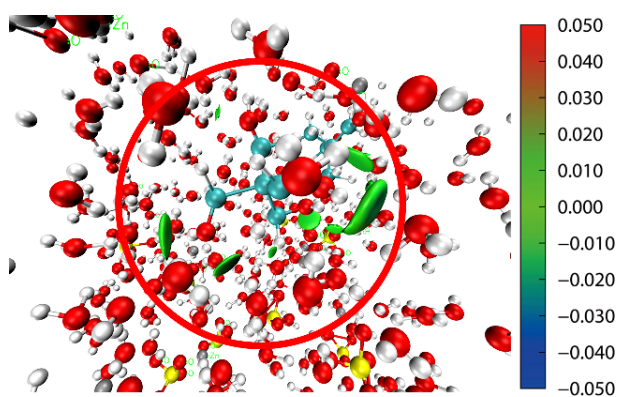

**Figure S8.** Snapshot of the intermolecular interactions between PTT and surrounding  $\text{ZnSO}_4$  molecules in the model of 2 M  $\text{ZnSO}_4$  with 0.05 M PTT. Colour code: red, O; white, H; yellow, S; cyan, C; grey, Zn.

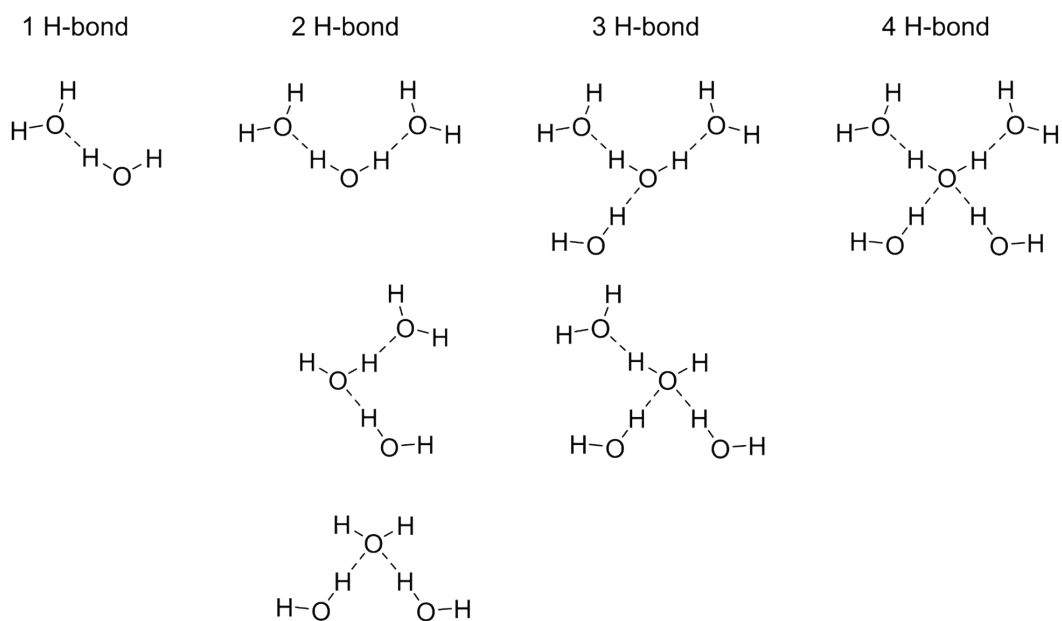

**Figure S9.** Classification of different numbers of H-bonds between water molecules.

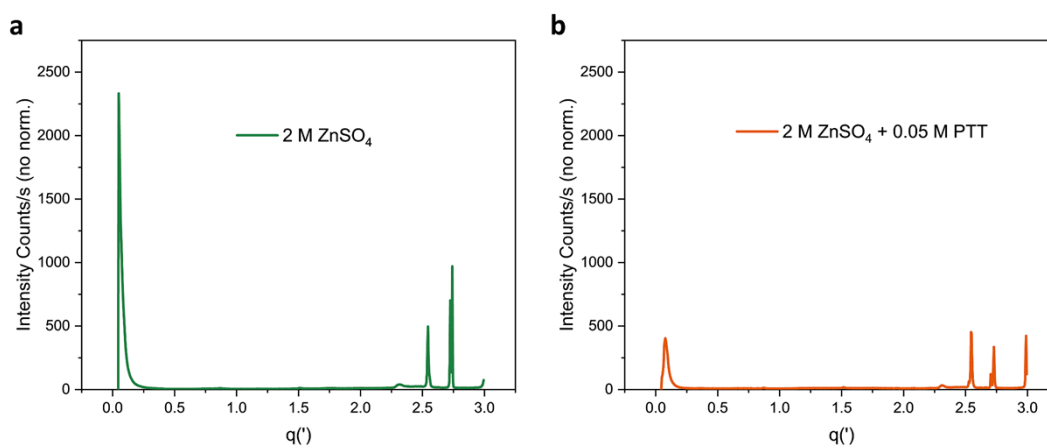

**Figure S10.** Intensity Counts for Zn electrodes in ZnSO<sub>4</sub> electrolyte (a) and ZnSO<sub>4</sub> electrolyte with PTT addition (b) after the 100<sup>th</sup> plating.

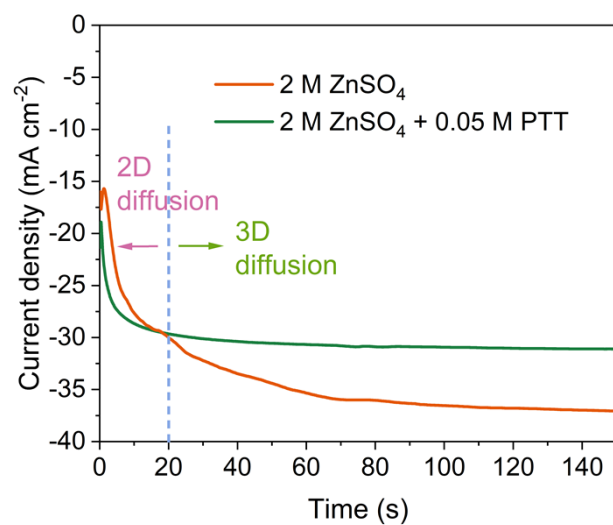

**Figure S11.** Chronoamperometry (CA) curves of Zn/Cu coin cells containing pure 2 M ZnSO<sub>4</sub> electrolyte and 2 M ZnSO<sub>4</sub> with 0.05 M PTT at a constant potential of -150 mV.

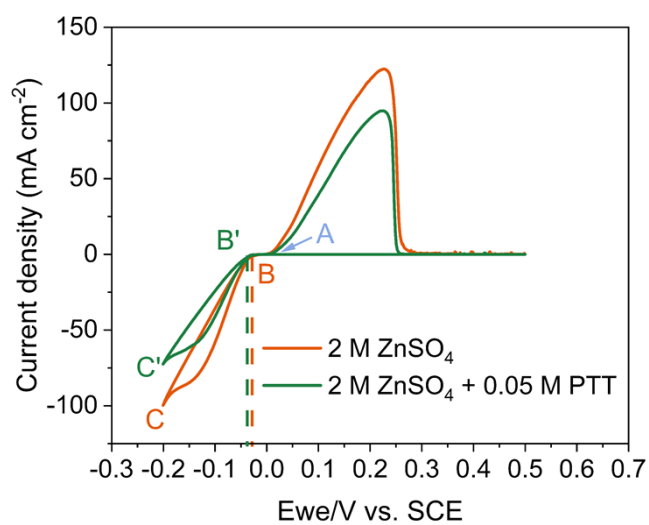

**Figure S12.** Chronoamperometry (CA) curves of Zn/Cu coin cells containing 2 M

ZnSO<sub>4</sub> and 2 M ZnSO<sub>4</sub> with 0.05 M PTT at 0.5 mV s<sup>-1</sup>.

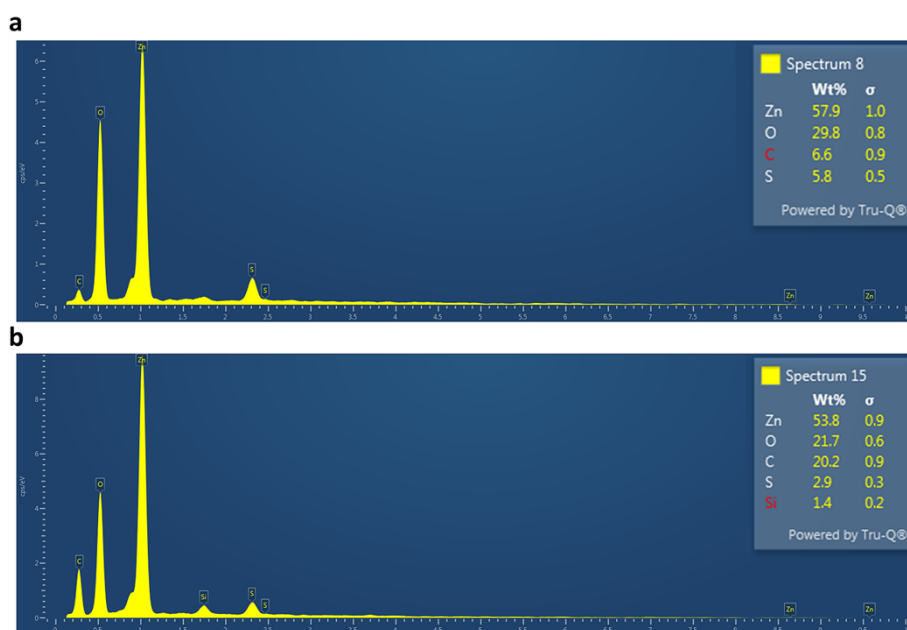

**Figure S13.** Energy dispersive X-ray spectroscopy (EDX) analysis of Zn electrode in ZnSO<sub>4</sub> electrolyte (a) and ZnSO<sub>4</sub> electrolyte with PTT addition (b) after the 100<sup>th</sup> plating.

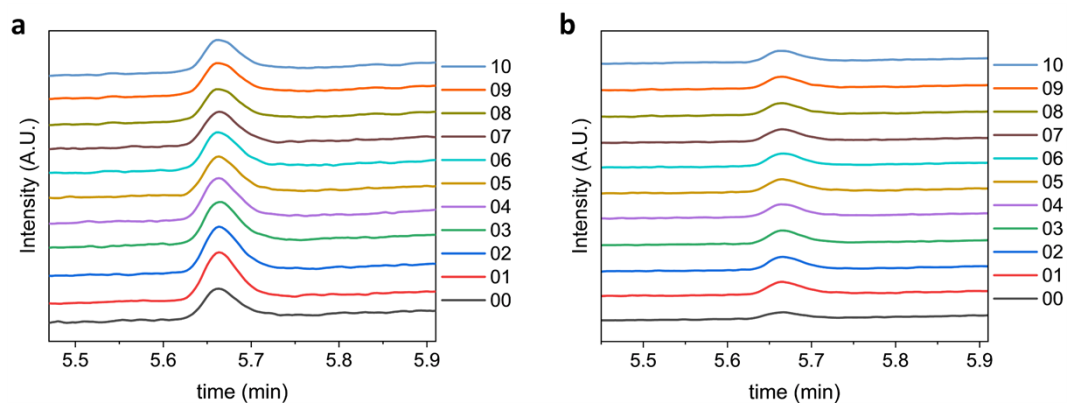

**Figure S14.** *In situ* GC curves to dynamically evaluate the H<sub>2</sub> amount during the Zn plating/stripping (a) in pure ZnSO<sub>4</sub> electrolytes and (b) in ZnSO<sub>4</sub> electrolyte with PTT



addition.

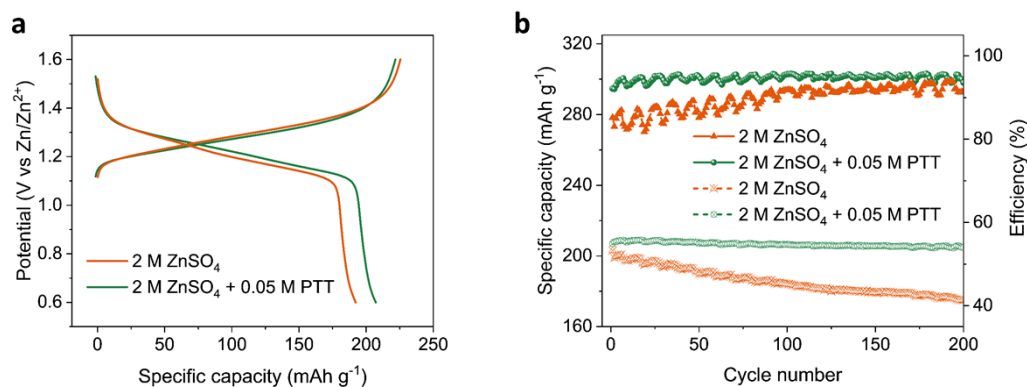

**Figure S15.** (a) Galvanostatic charge/discharge curves of Zn-I<sub>2</sub> full cells with containing 2 M ZnSO<sub>4</sub> electrolyte and 2 M ZnSO<sub>4</sub> with 0.05 M PTT at 0.2 A g<sup>-1</sup>. (b) Cycling performance of Zn-I<sub>2</sub> full cells with containing 2 M ZnSO<sub>4</sub> electrolyte and 2 M ZnSO<sub>4</sub> with 0.05 M PTT at 0.2 A g<sup>-1</sup>.

**Table S1.** Dihedral angles of common configurations of PTT molecules.

| □ | Omega (H-O-C-C) (degree, °) |        |        |        |        |        |        |       |
|---|-----------------------------|--------|--------|--------|--------|--------|--------|-------|
|   | Sequence                    | 1      | 2      | 3      | 4      | 5      | 6      | 7     |
|   | <b>O1</b>                   | 111.82 | 179.94 | 72.66  | 179.60 | 66.89  | 64.12  | 73.03 |
|   | <b>O2</b>                   | 74.85  | 73.36  | 69.98  | 63.81  | 178.67 | 179.27 | 74.70 |
|   | <b>O3</b>                   | 69.42  | 69.69  | 178.93 | 75.47  | 79.03  | 75.79  | 76.58 |

**O4**    179.99    70.56    70.77    79.65    76.81    75.12    179.49

---

**Table S2.** Numbers of molecules in different solution models.

| <b>System</b>                                | <b>Nº of water molecules</b> | <b>Nº of ZnSO<sub>4</sub></b> | <b>Nº of PTT molecules</b> |
|----------------------------------------------|------------------------------|-------------------------------|----------------------------|
| Pure ZnSO <sub>4</sub> solution              | 5000                         | 200                           | –                          |
| ZnSO <sub>4</sub> solution with PTT addition | 5000                         | 200                           | 5                          |

---

**Table S3.** Periodic boundary size of different system cells.

| <b>System</b>                       | <b>Cell length (Å)</b> | <b>Cell length (Å)</b> | <b>Cell length (Å)</b> |
|-------------------------------------|------------------------|------------------------|------------------------|
| Pure ZnSO <sub>4</sub> solution     | 52.435                 | 52.434                 | 52.435                 |
| ZnSO <sub>4</sub> solution with PTT | 54.930                 | 54.931                 | 54.931                 |

---
